# Supplementary material for: Synthesis of piperidine and pyrrolidine derivatives by electroreductive cyclization of imine with terminal dihaloalkanes in a flow microreactor
Source: PubMed Central journal article supplement (PMC8978912; doi:10.3762/bjoc.18.39), 2022-03-29
Supplement: Beilstein_J_Org_Chem-18-350-s001.pdf [file Beilstein_J_Org_Chem-18-350-s001.pdf]

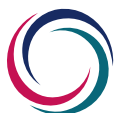

## Supporting Information

for

### **Synthesis of piperidine and pyrrolidine derivatives by electroreductive cyclization of imine with terminal dihaloalkanes in a flow microreactor**

Yuki Naito, Naoki Shida and Mahito Atobe

*Beilstein J. Org. Chem.* **2022**, *18*, 350–359. [doi:10.3762/bjoc.18.39](https://doi.org/10.3762/bjoc.18.39)

**Detailed experimental procedures, analytical data, and supplementary figures, and photographs**

## **Contents**

|                                                                                    |     |
|------------------------------------------------------------------------------------|-----|
| Synthesis                                                                          | S2  |
| Fabrication of electrochemical flow microreactor                                   | S4  |
| Procedure for electroreductive cyclization in an electrochemical flow microreactor | S5  |
| Procedure for electroreductive cyclization in a batch-type reactor                 | S6  |
| Linear sweep voltammetry                                                           | S7  |
| HPLC analysis                                                                      | S13 |
| <sup>1</sup> H NMR spectra                                                         | S15 |
| Supporting reference                                                               | S18 |



current density, 38.1 mA cm<sup>-2</sup>; flow rate, 11 mL h<sup>-1</sup>; residence time, 3.9 s; collection volume and time for the reaction solution, 10 mL, 54 min 35 s). After collecting the reaction solution, the solvent was removed from the reaction mixture under reduced pressure and filtered through Celite with dichloromethane. The residue was purified by column chromatography using silica gel (hexane/Et<sub>2</sub>O/triethylamine = 95/5/0.1%) to afford the products **3a** and **3b**. However, in the synthesis of **3c** by this method, no NMR signals corresponding to **3c** were observed for the reaction mixture; therefore, **3c** could not be isolated.

1,2-Diphenylpiperidine (**3a**):<sup>2</sup> yellow liquid, 78.4 mg, 55% yield. <sup>1</sup>H NMR (500 MHz; CDCl<sub>3</sub>): δ 7.29-7.21 (m, 4H), 7.17-7.11 (m, 3H), 6.89 (d, *J*=8.0 Hz, 2H), 6.75 (t, *J* = 7.2 Hz, 1H), 4.50 (dd, *J* = 6.9, 4.6 Hz, 1H), 3.43-3.38 (m, 1H), 3.29-3.23 (m, 1H), 2.03-1.52 (m, 6H).

1,2-Diphenylpyrrolidine (**3b**):<sup>2</sup> yellow liquid, 75.8 mg, 57% yield. <sup>1</sup>H NMR (500 MHz; CDCl<sub>3</sub>): δ 7.31-7.27 (m, 2H), 7.23-7.18 (m, 3H), 7.15-7.11 (m, 2H), 6.65-6.61 (m, 1H), 6.49 (d, *J* = 8.60 Hz, 2H), 4.72 (d, *J* = 8.00 Hz, 1H), 3.73-3.67 (m, 1H), 3.44-3.37 (m, 1H), 2.42-2.32 (m, 1H), 2.07-1.90 (m, 3H).

## 2. Fabrication of electrochemical flow microreactor

The detailed procedure for fabrication of the electrochemical flow microreactor is described in the experimental section of the main text.

Figure S1 shows a schematic illustration and a photograph of the electrochemical flow microreactor. Figure S2 shows a schematic illustration of the construction procedure for the electrochemical flow microreactor.

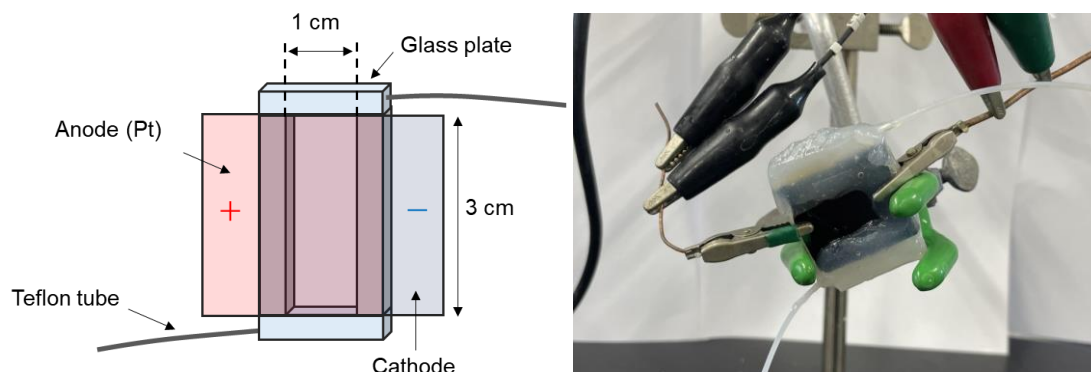

**Figure S1:** Schematic illustration (adapted with permission from ref. [3]. Copyright 2021 American Chemical Society; this content is not subject to CC BY 4.0) and photograph of the electrochemical flow microreactor.

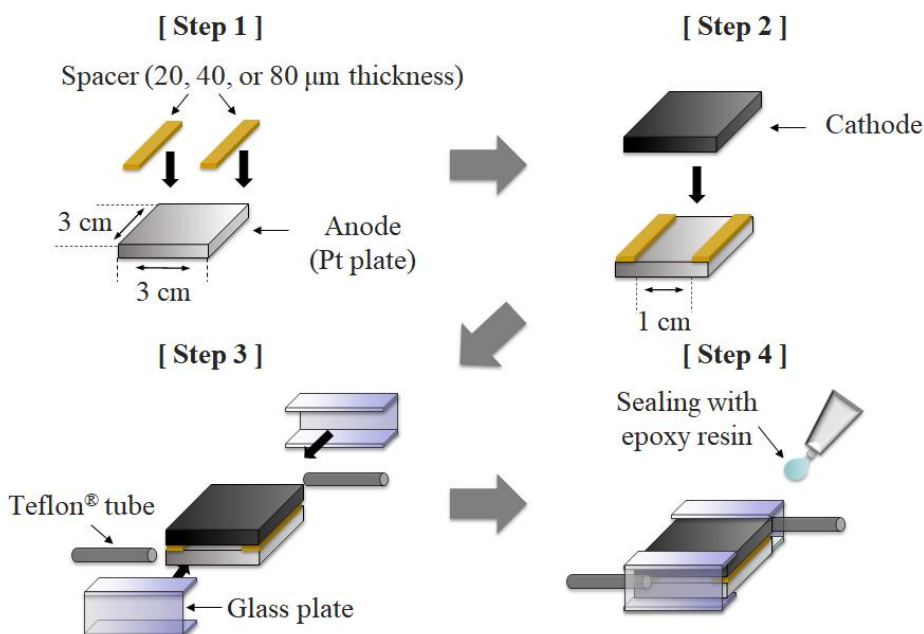

**Figure S2:** Schematic illustration of procedure for construction of the electrochemical flow microreactor. Adapted with permission from ref. [3]. Copyright 2021 American Chemical Society. This content is not subject to CC BY 4.0.

### 3. Procedure for electroreductive cyclization in an electrochemical flow microreactor

The detailed procedure for electroreductive cyclization in an electrochemical flow microreactor is described in the experimental section of the main text. Electricity ( $F \text{ mol}^{-1}$ ) to the electrolyte as it passes through the reactor was determined by the following equation.

$$\begin{aligned} \text{Electricity [F mol}^{-1}] &= \frac{\text{Charge passed in microreactor per second [F s}^{-1}]}{\text{Substrate introduced into microreactor per second [mol s}^{-1}]} \\ &= \frac{\frac{1}{96485} [\text{F C}^{-1}] \times (\text{Current density}[\text{mA cm}^{-2}] \times \frac{1}{1000} [\text{A mA}^{-1}] \times \text{Electrode surface area}[\text{cm}^2]) [\text{C s}^{-1}]}{(\text{flow rate}[\text{mL h}^{-1}] \times \frac{1}{1000} [\text{L mL}^{-1}] \times \frac{1}{3600} [\text{h s}^{-1}] \times \text{Concentration of substrate}[\text{mol L}^{-1}]) [\text{mol s}^{-1}]} \end{aligned}$$

Figure S3 shows a photograph of the setup for electroreductive cyclization using an electrochemical flow microreactor.

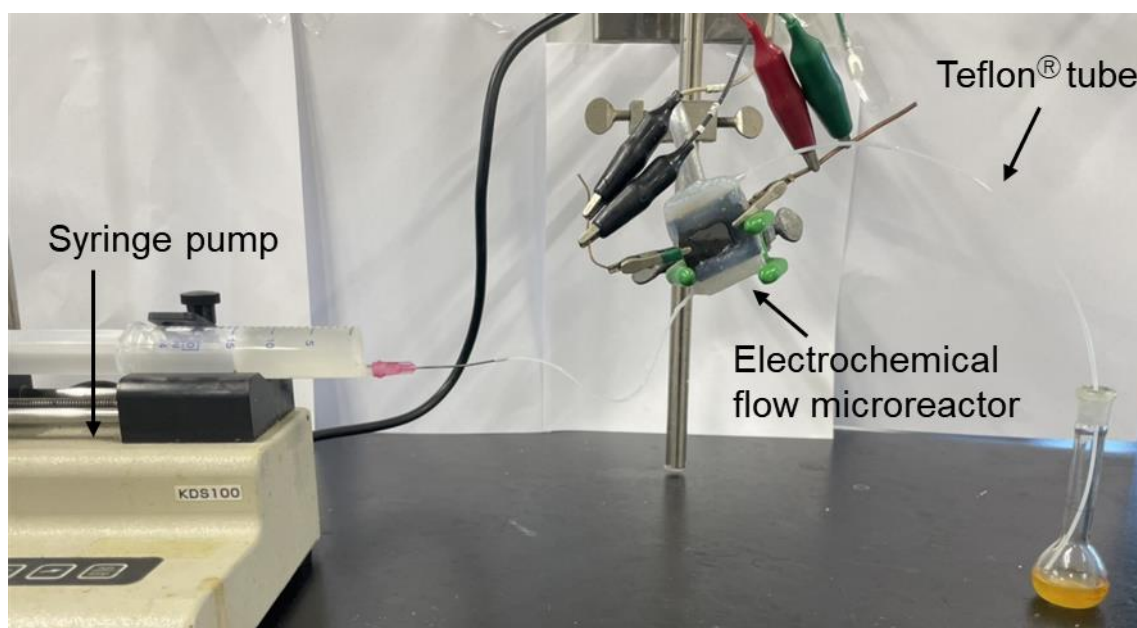

**Figure S3:** Photograph of the setup for the electroreductive cyclization using an electrochemical flow microreactor.

#### 4. Procedure for electroreductive cyclization in a batch-type reactor

The detailed procedure for electroreductive cyclization in an electrochemical flow microreactor is described in the experimental section of the main text. Figure S4 shows a photograph of the setup for electroreductive cyclization using a batch-type reactor.

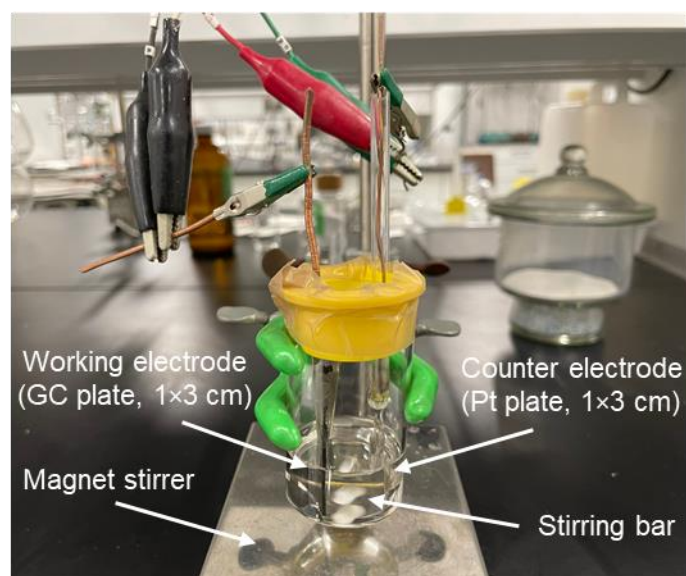

**Figure S4:** Photograph of the setup for the electroreductive cyclization using a batch-type reactor.

## 5. Linear sweep voltammetry

### 5-1. Effect of the electrode material on the reduction potential

LSV measurements were performed to estimate the reduction potentials of benzylideneaniline (**1**) and 1,4-dibromobutane (**2a**) using each of the three electrode materials (Pt, GC, and Ag). 20 mL of 0.1 M  $n\text{Bu}_4\text{N}\cdot\text{ClO}_4/\text{THF}$  solution containing 0.06 M benzylideneaniline (**1**) or 0.06 M 1,4-dibromobutane (**2a**), or their mixture was added to a beaker type cell for LSV measurements.  $\text{N}_2$  gas was purged through the electrolyte solution with stirring for at least 30 min. Voltammograms were recorded using a Pt, GC, or Ag disk electrode (3.0 mm diameter) at a scan rate of  $50 \text{ mV s}^{-1}$ . Platinum mesh and Ag/AgCl were used as the counter and reference electrodes, respectively.

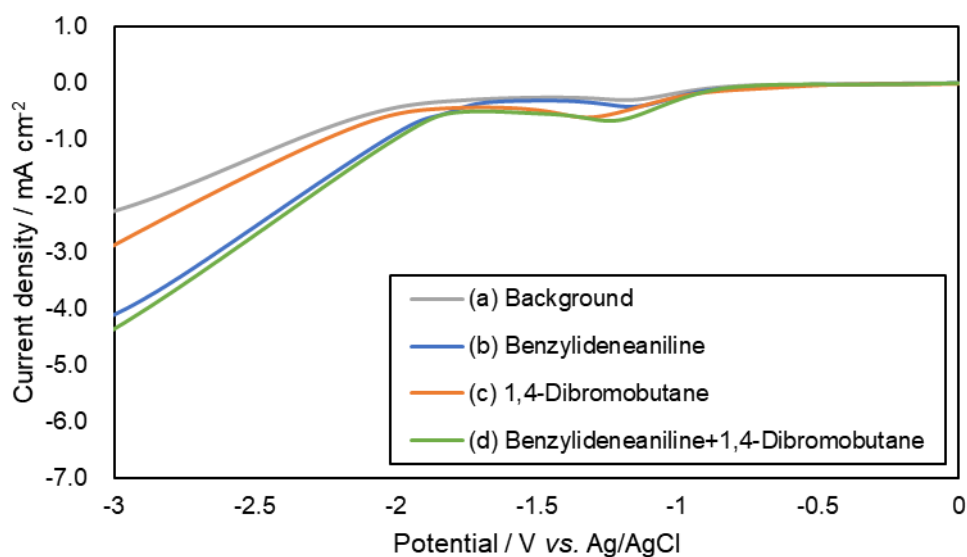

**Figure S5:** Linear sweep voltammograms of (a) background, (b) 0.06 M benzylideneaniline (**1**), (c) 0.06 M 1,4-dibromobutane (**2a**), and (d) 0.06 M benzylideneaniline (**1**) and 0.06 M 1,4-dibromobutane (**2a**) using a Pt disk electrode.



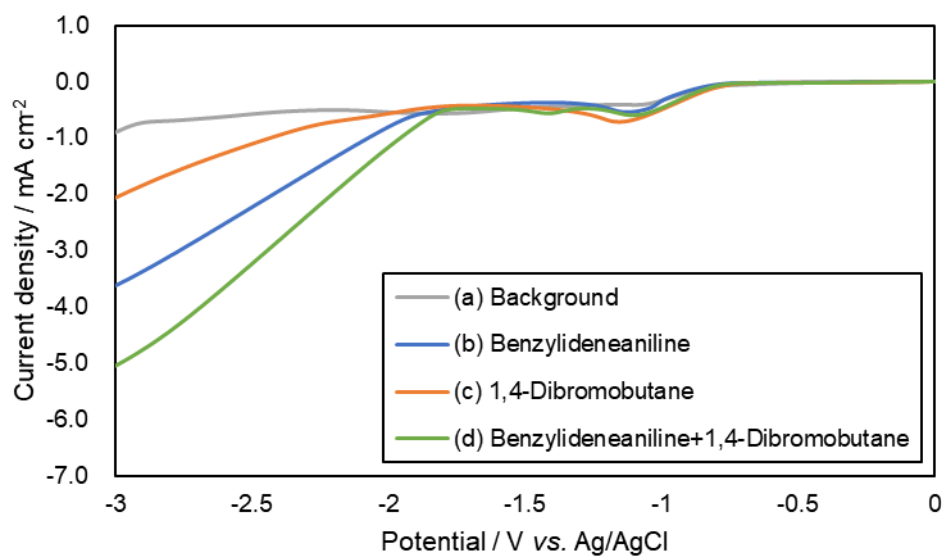

**Figure S6:** Linear sweep voltammograms of (a) background, (b) 0.06 M benzylideneaniline (**1**), (c) 0.06 M 1,4-dibromobutane (**2a**), and (d) 0.06 M benzylideneaniline (**1**) and 0.06 M 1,4-dibromobutane (**2a**) using a GC disk electrode.

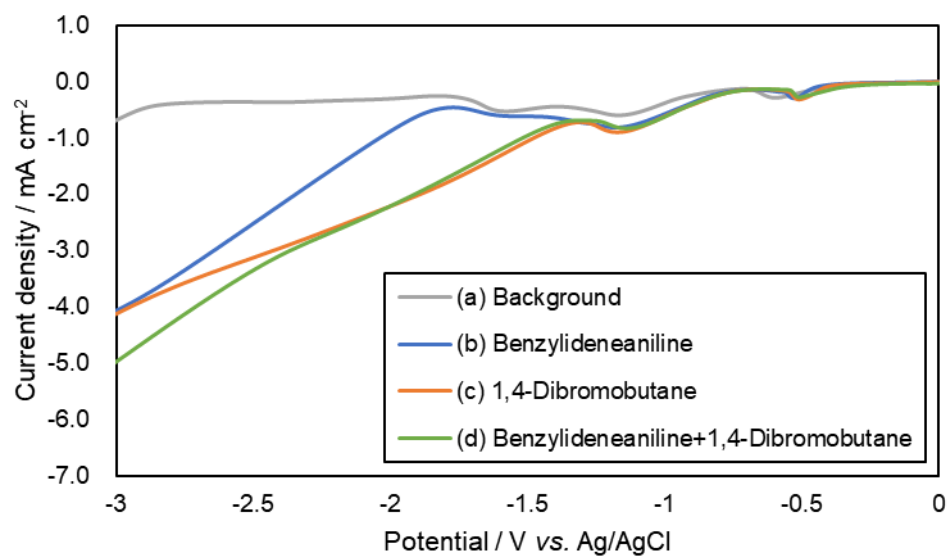

**Figure S7:** Linear sweep voltammograms of (a) background, (b) 0.06 M benzylideneaniline (**1**), (c) 0.06 M 1,4-dibromobutane (**2a**), and (d) 0.06 M benzylideneaniline (**1**) and 0.06 M 1,4-dibromobutane (**2a**) using a Ag disk electrode.

## 7-2. Investigation of the reduction potential of various terminal dihaloalkanes

LSV measurements were performed to estimate the reduction potentials of benzylideneaniline **1** and various terminal dihaloalkanes **2** (**2a–c**) using a GC disk electrode. 20 mL of 0.1 M  $n\text{Bu}_4\text{N}\cdot\text{ClO}_4/\text{THF}$  solution containing 0.06 M benzylideneaniline **1** or 0.06 M terminal dihaloalkane **2**, or their mixture was added to a beaker type cell for LSV measurements.  $\text{N}_2$  gas was purged through the electrolyte solution with stirring for at least 30 min. Voltammograms were recorded using a GC disk electrode (3.0 mm diameter) at a scan rate of  $50 \text{ mV s}^{-1}$ . Platinum mesh and Ag/AgCl were used as the counter and reference electrodes, respectively.

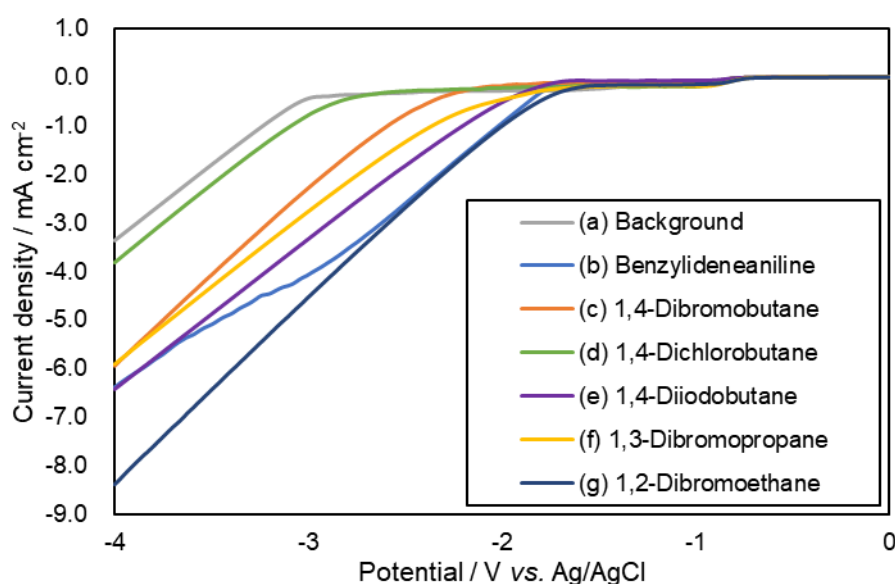

**Figure S8:** Linear sweep voltammograms of (a) background, (b) 0.06 M benzylideneaniline (**1**), (c) 0.12 M 1,4-dibromobutane (**2a**), (d) 0.12 M 1,4-dichlorobutane (**2c**), (e) 0.12 M 1,4-diiodobutane (**2c**), (f) 0.12 M 1,3-dibromopropane (**2d**), and (g) 0.12 M 1,2-dibromoethane (**2e**).

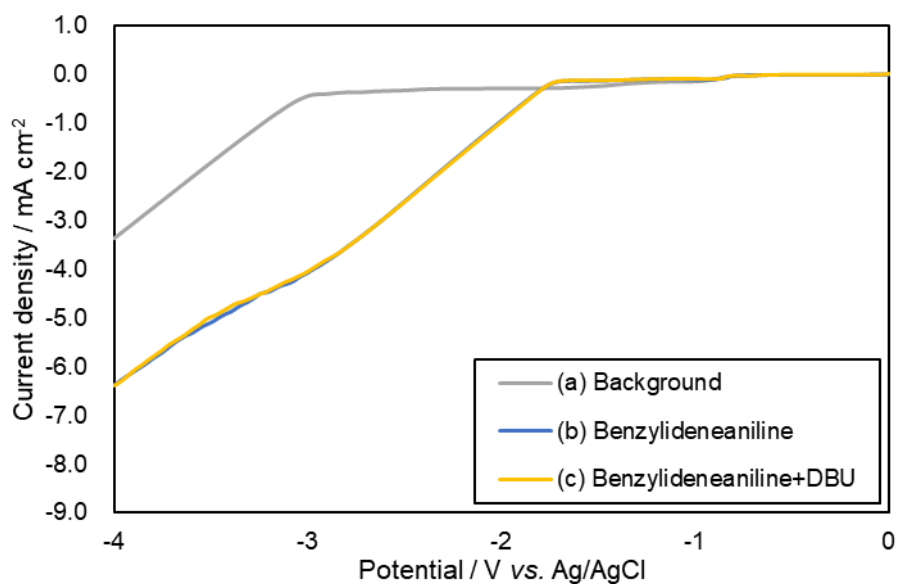

**Figure S9:** Linear sweep voltammograms of (a) background, (b) 0.06 M benzylideneaniline (**1**), and (c) 0.06 M benzylideneaniline (**1**) and 0.06 M DBU.

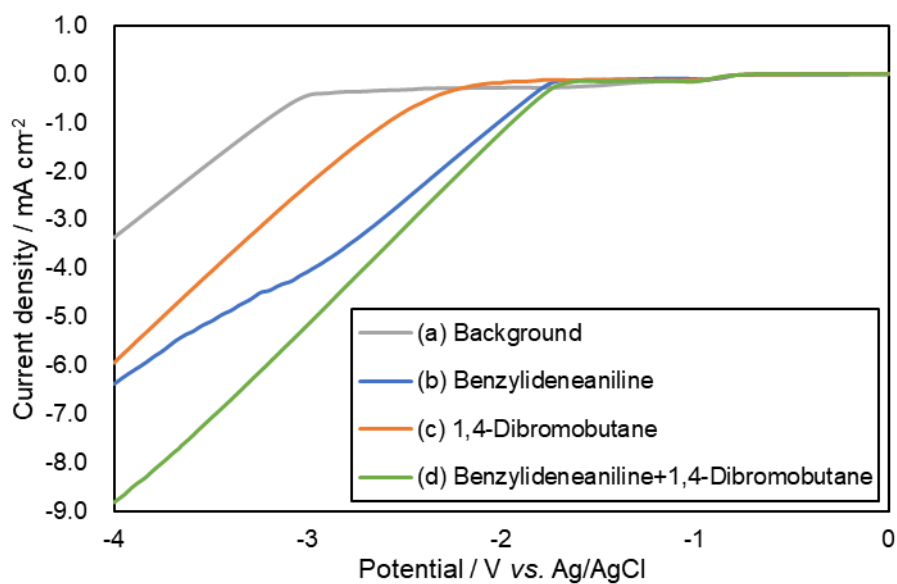

**Figure S10:** Linear sweep voltammograms of (a) background, (b) 0.06 M benzylideneaniline (**1**), (c) 0.12 M 1,4-dibromobutane (**2a**), and (d) 0.06 M benzylideneaniline (**1**), 0.12 M 1,4-dibromobutane (**2a**), and 0.06 M DBU.

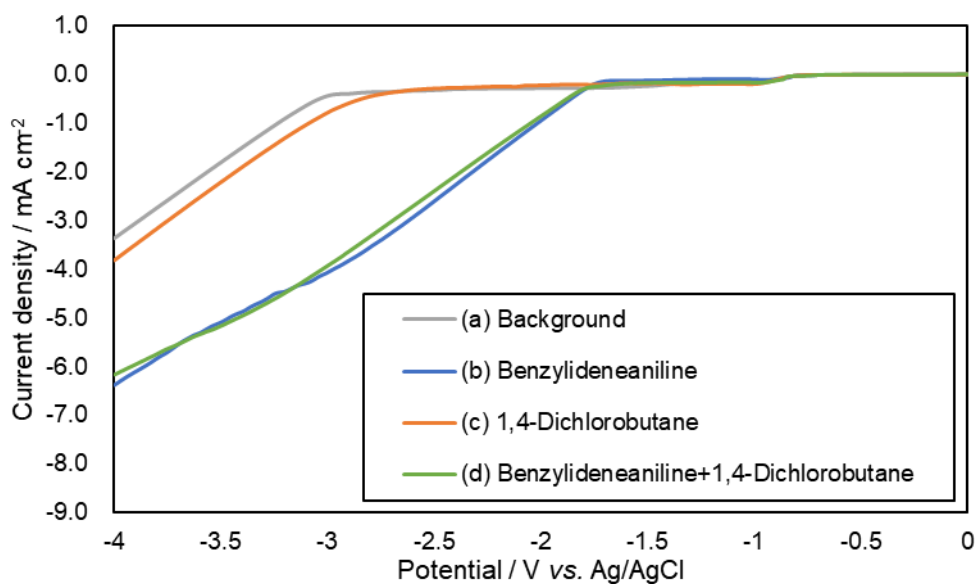

**Figure S11:** Linear sweep voltammograms of (a) background, (b) 0.06 M benzylideneaniline (**1**), (c) 0.12 M 1,4-dichlorobutane (**2b**), and (d) 0.06 M benzylideneaniline (**1**), 0.12 M 1,4-dichlorobutane (**2b**), and 0.06 M DBU.

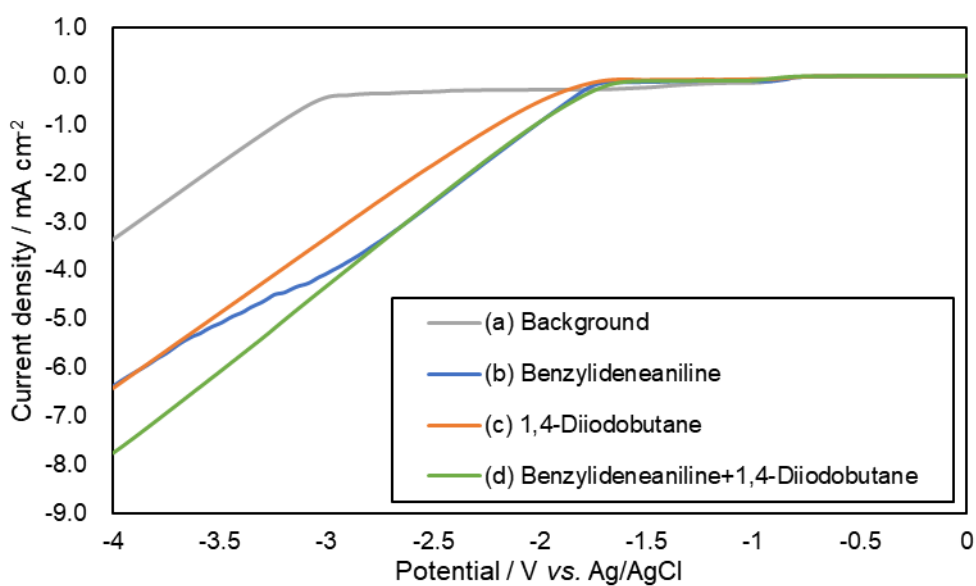

**Figure S12:** Linear sweep voltammograms of (a) background, (b) 0.06 M benzylideneaniline (**1**), (c) 0.12 M 1,4-diiodobutane (**2c**), and (d) 0.06 M benzylideneaniline (**1**), 0.12 M 1,4-diiodobutane (**2c**), and 0.06 M DBU.

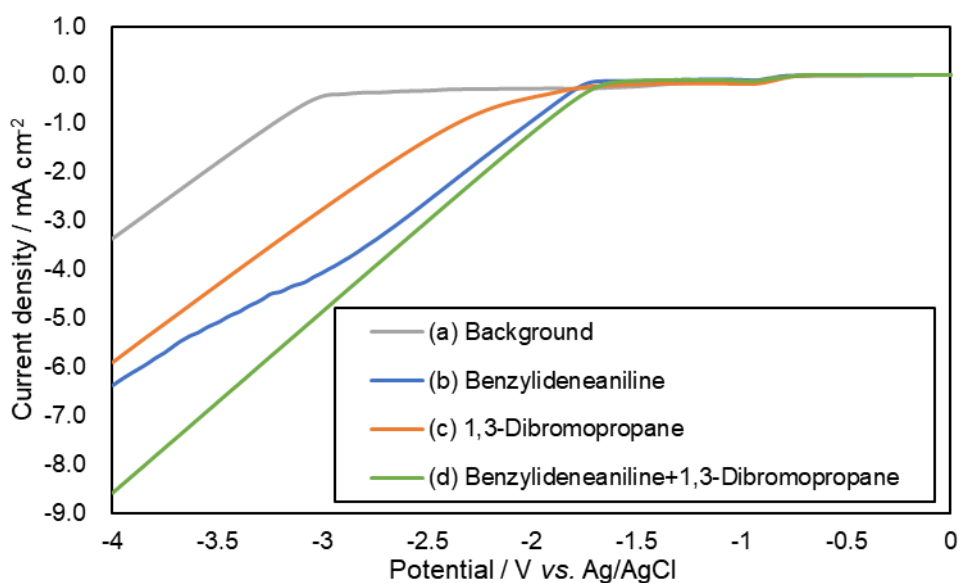

**Figure S13:** Linear sweep voltammograms of (a) background, (b) 0.06 M benzylideneaniline (**1**), (c) 0.12 M 1,3-dibromopropane (**2d**), and (d) 0.06 M benzylideneaniline (**1**), 0.12 M 1,3-dibromopropane (**2d**), and 0.06 M DBU.

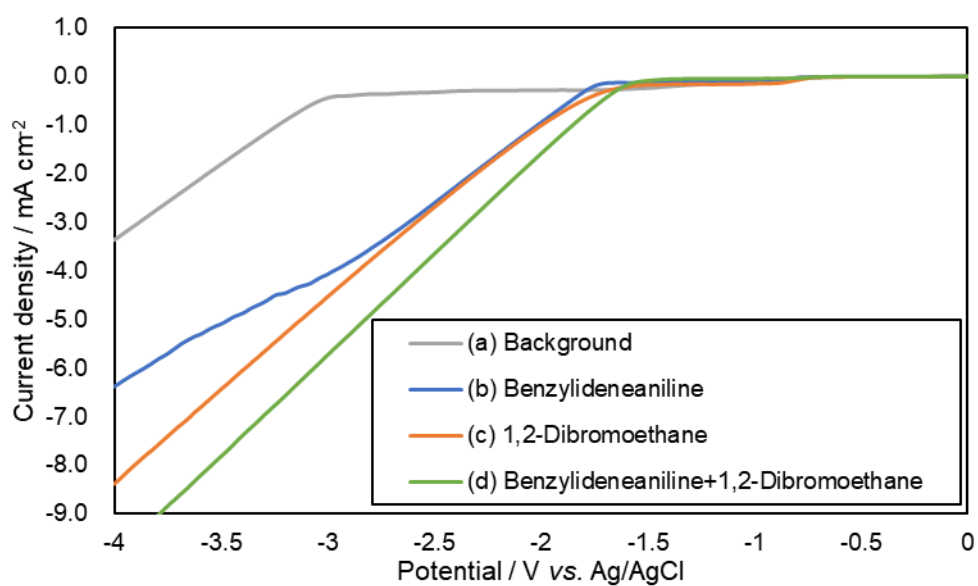

**Figure S14:** Linear sweep voltammograms of (a) background, (b) 0.06 M benzylideneaniline (**1**), (c) 0.12 M 1,2-dibromoethane (**2e**), and (d) 0.06 M benzylideneaniline (**1**), 0.12 M 1,2-dibromoethane (**2e**), and 0.06 M DBU.

## 6. HPLC analysis

Typical HPLC chart for the analysis of an electrolyzed solution and calibration curves for HPLC analysis are shown in Figure S15.

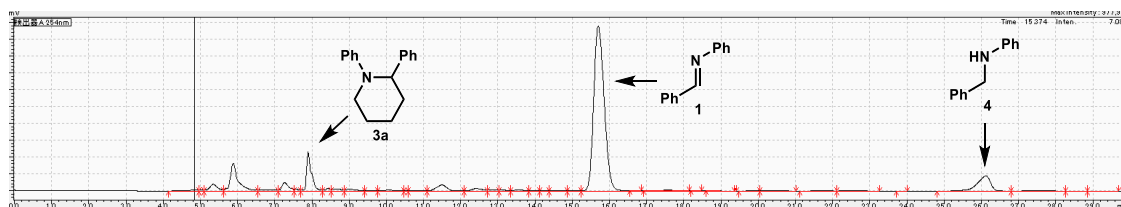

**Figure S15:** HPLC chart of the reaction mixture after electroreductive cyclization (corresponding to Entry 1 of Table 6).

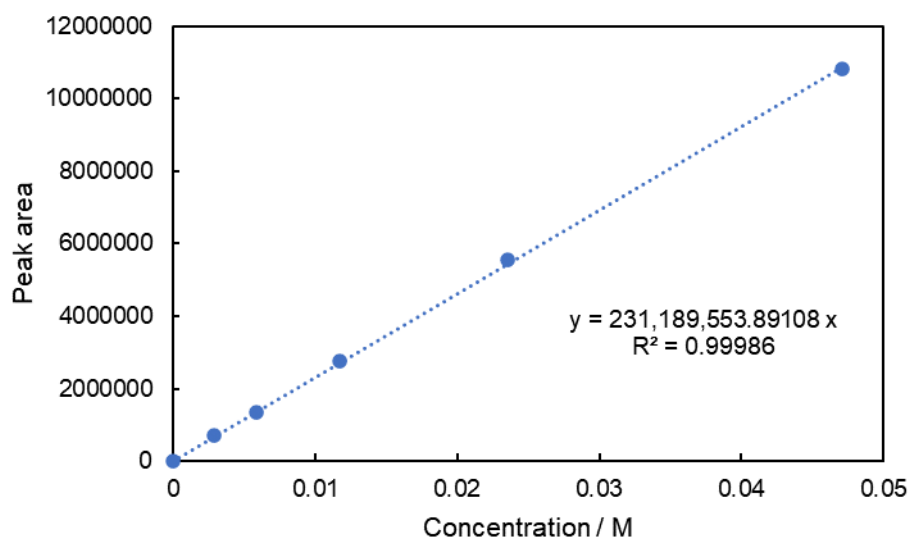

**Figure S16:** Calibration curve of **3a** for HPLC analysis.

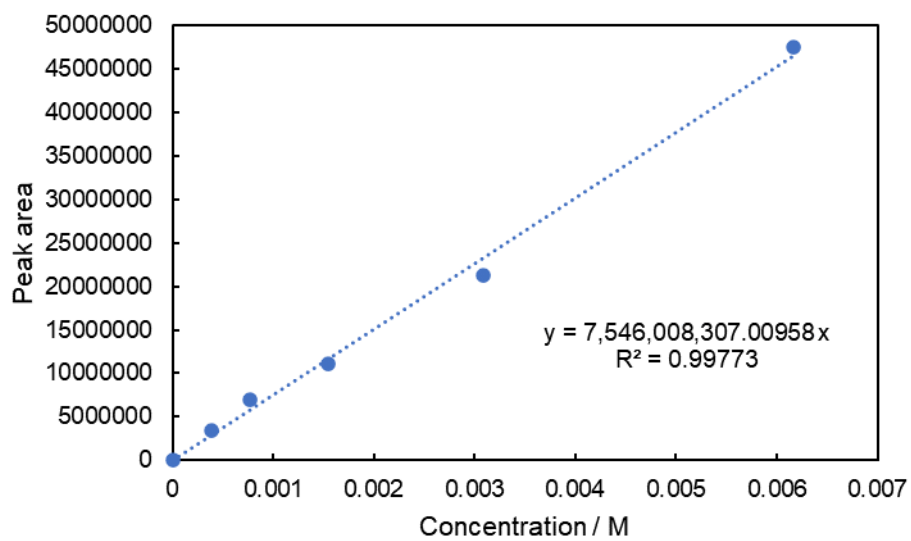

**Figure S17:** Calibration curve of **1** for HPLC analysis.

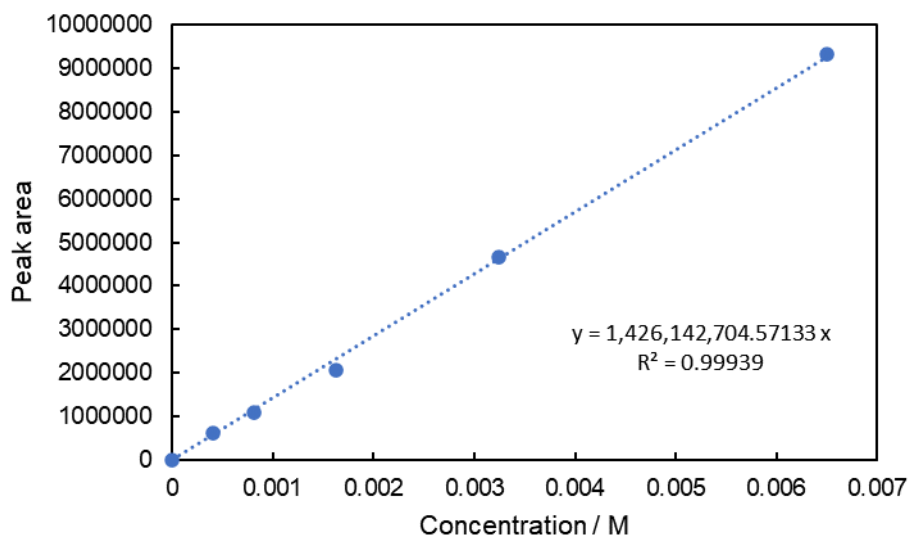

**Figure S18:** Calibration curve of **4** for HPLC analysis.

## 7. $^1\text{H}$ NMR spectra

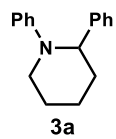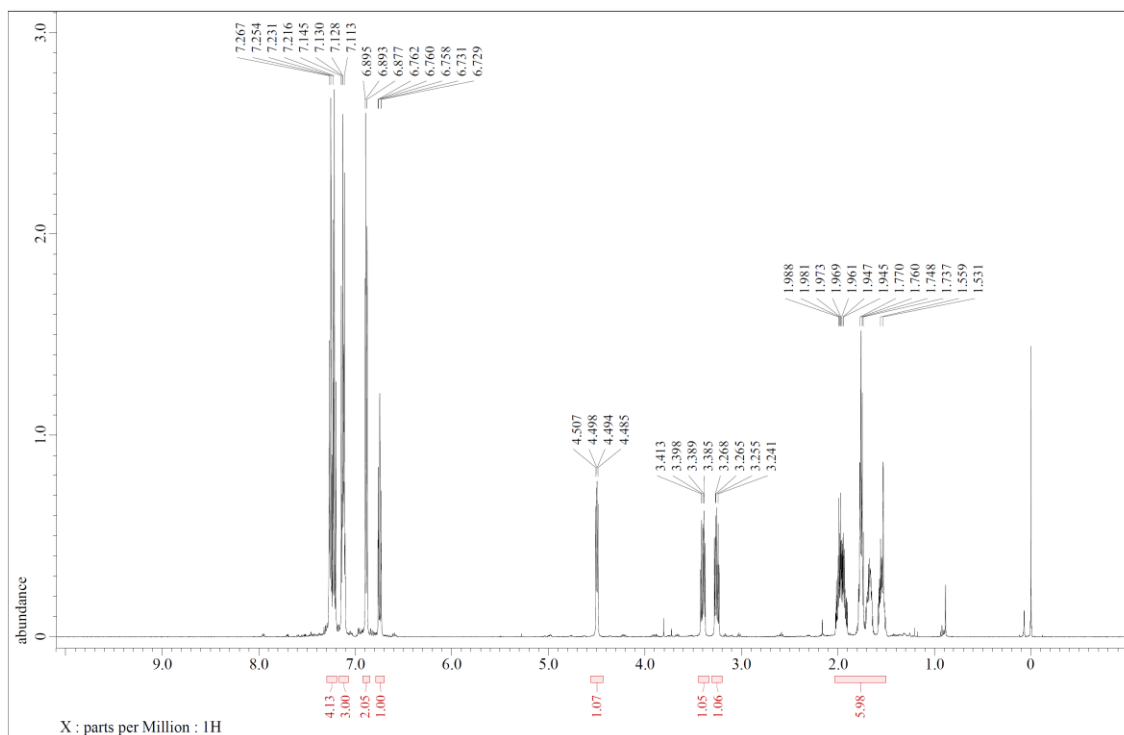

**Figure S19:**  $^1\text{H}$  NMR (500 MHz;  $\text{CDCl}_3$ ) spectrum of 1,2-diphenylpiperidine (**3a**) synthesized as an authentic sample for HPLC analysis.



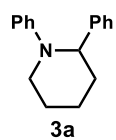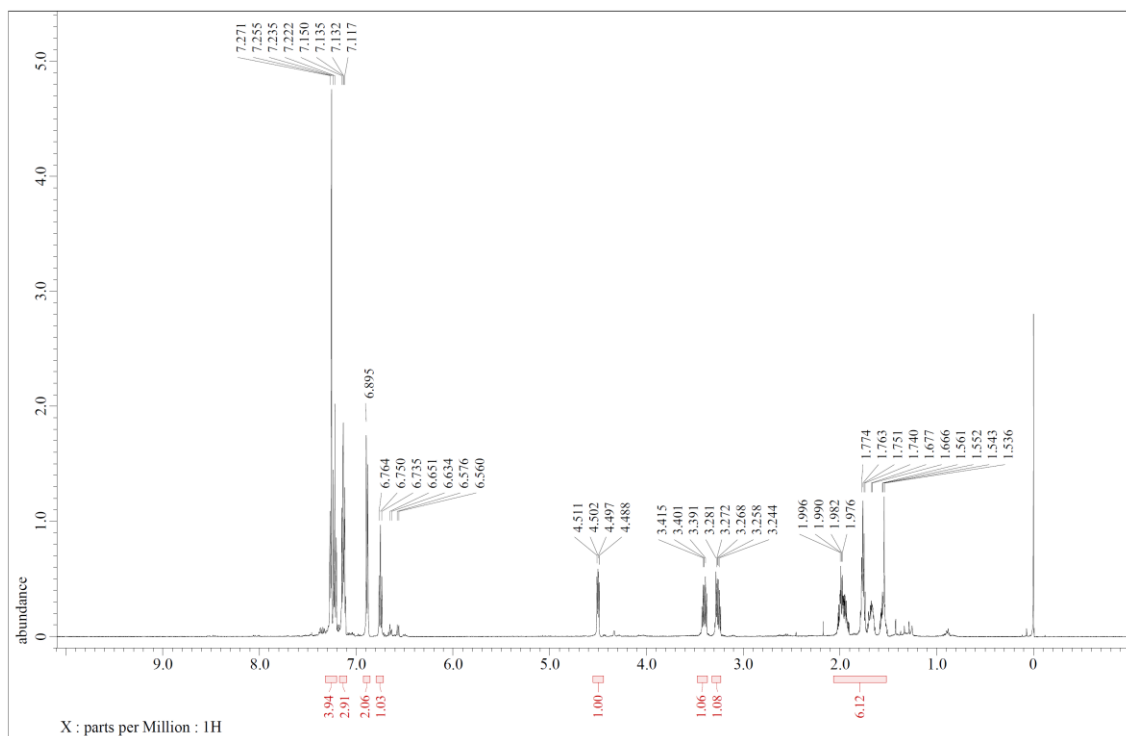

**Figure S20:**  $^1\text{H}$  NMR (500 MHz;  $\text{CDCl}_3$ ) spectrum of 1,2-diphenylpiperidine (**3a**) synthesized by electroreductive cyclization using an electrochemical flow microreactor.

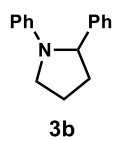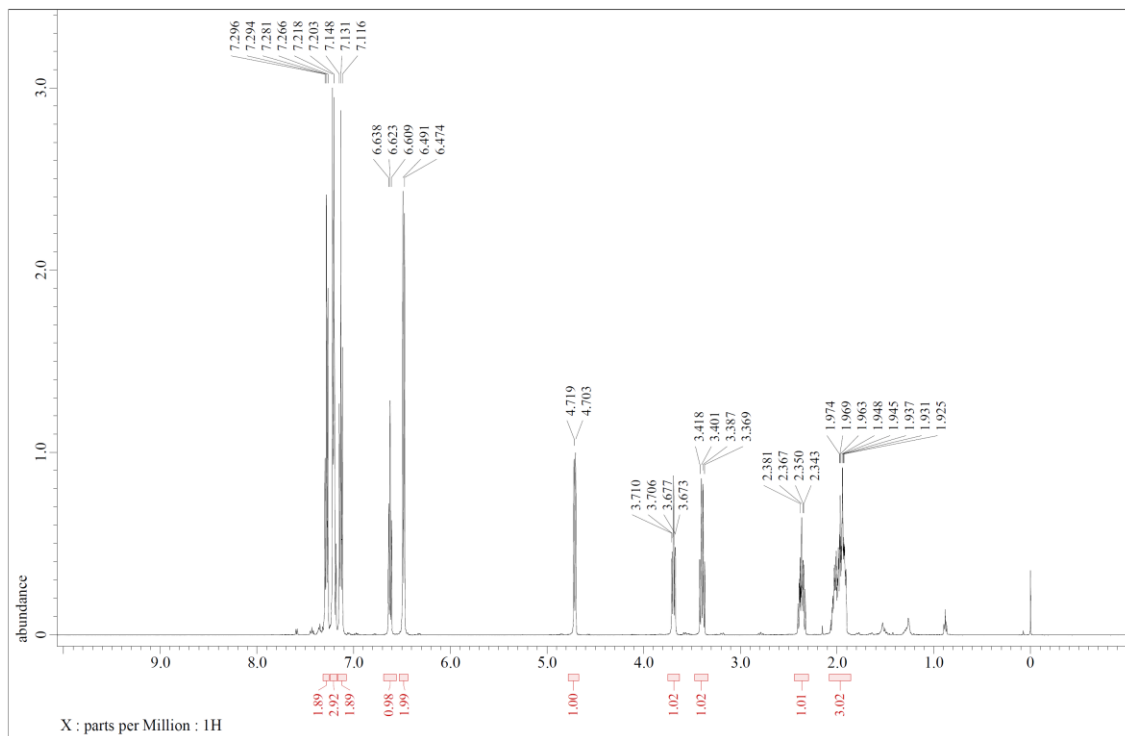

**Figure S21:**  $^1\text{H}$  NMR (500 MHz;  $\text{CDCl}_3$ ) spectrum of 1,2-diphenylpyrrolidine (**3b**) synthesized by electroreductive cyclization using an electrochemical flow microreactor.

### Supporting references

- 1 M. A. Topchiy, A. F. Asachenko and M. S. Nechaev, *European J. Org. Chem.*, 2014, **2014**, 3319–3322.
- 2 D. Wei, C. Netkaew and C. Darcel, *Adv. Synth. Catal.*, 2019, **361**, 1781–1786.
- 3 Y. Naito, Y. Nakamura, N. Shida, H. Senboku, K. Tanaka and M. Atobe, *J. Org. Chem.*, 2021, **86**, 15953–15960.
